# Supplementary material for: Developmental Changes in Sleep Oscillations during Early Childhood
Source: PubMed Central journal article supplement (PMC5563422; doi:10.1155/2017/6160959), 2017-08-15

## Supplementary Material

### Developmental changes in sleep oscillations during early childhood

Eckehard Olbrich<sup>1</sup>, Thomas Rusterholz<sup>2,3</sup>, Monique K. LeBourgeois<sup>4,\*</sup>, Peter Achermann<sup>2,5,6,7,\*</sup>

<sup>1</sup> Max Planck Institute for Mathematics in the Sciences, Leipzig, Germany

<sup>2</sup> Institute of Pharmacology and Toxicology, University of Zurich, Switzerland

<sup>3</sup> University Hospital of Child and Adolescent Psychiatry and Psychotherapy, University of Bern, Bern, Switzerland

<sup>4</sup> Sleep and Development Laboratory, Department of Integrative Physiology, University of Colorado Boulder, Boulder, CO, USA

<sup>5</sup> The KEY Institute for Brain-Mind Research, Department of Psychiatry, Psychotherapy and Psychosomatics, University Hospital of Psychiatry, Zurich, Switzerland

<sup>6</sup> Zurich Center for Interdisciplinary Sleep Research, University of Zurich, Switzerland

<sup>7</sup> Neuroscience Center Zurich, University and ETH Zurich, Switzerland

\* shared last authorship

#### Corresponding Author:

Eckehard Olbrich, PhD

Max Planck Institute for Mathematics in the Sciences

Inselstraße 22, 04103

Leipzig, Germany

e-mail: [olbrich@mis.mpg.de](mailto:olbrich@mis.mpg.de)

Tel. +49 341 9959 568 | Fax +49 341 9959 658

**Supplementary Figures S1 to S8: *Top*:** Spectrograms, oscillatory events and hypnograms of individual children (A-H) recorded longitudinally at 2Y (a), 3Y (b) and 5Y (c). For details, see Figure 1. ***Bottom*:** Mean power density spectra and event ratios of individual children (A-H) recorded longitudinally. For details, see Figure 3.

**Figure S1: CHILD A**

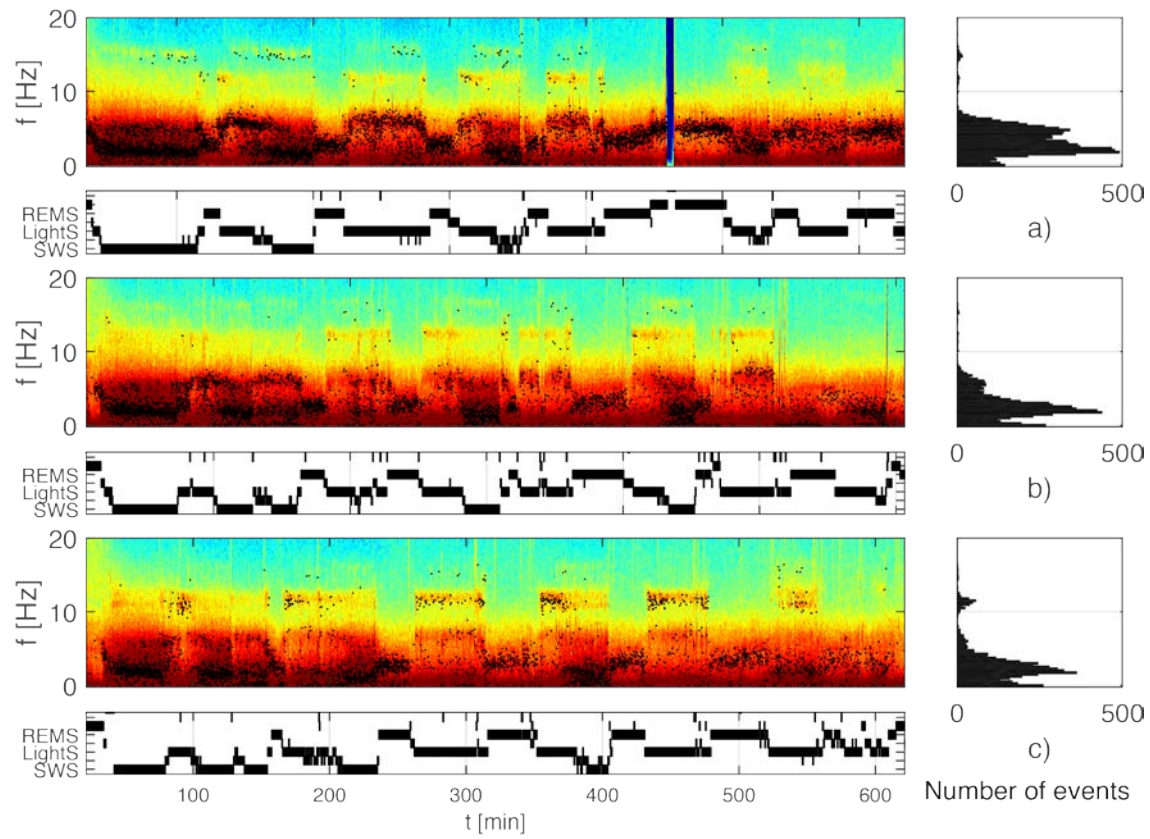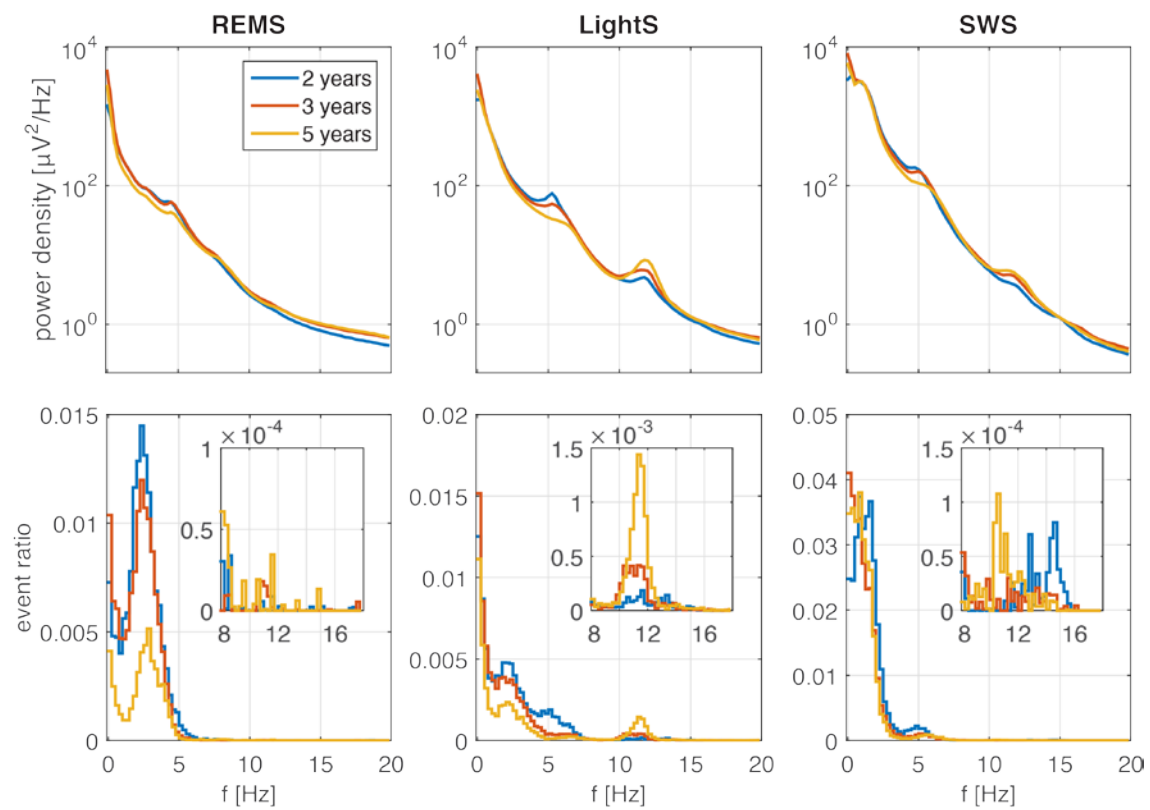

**Figure S2: CHILD B**

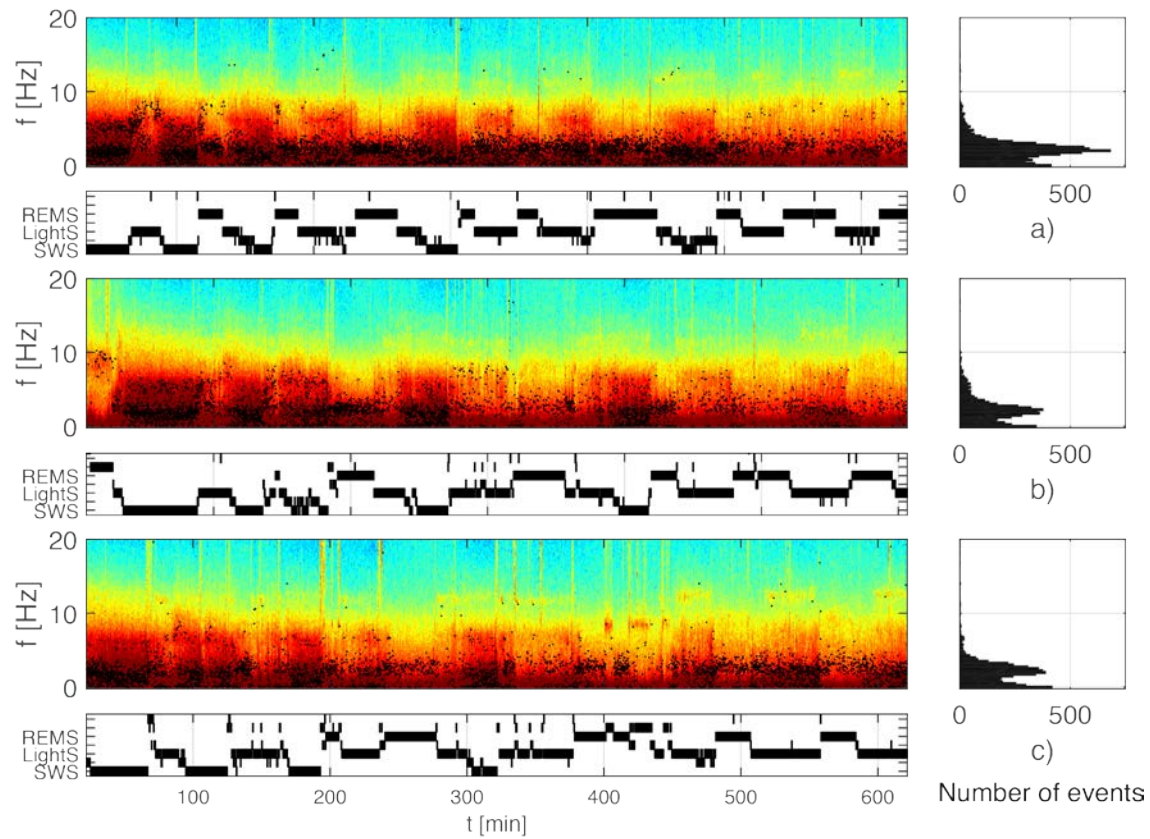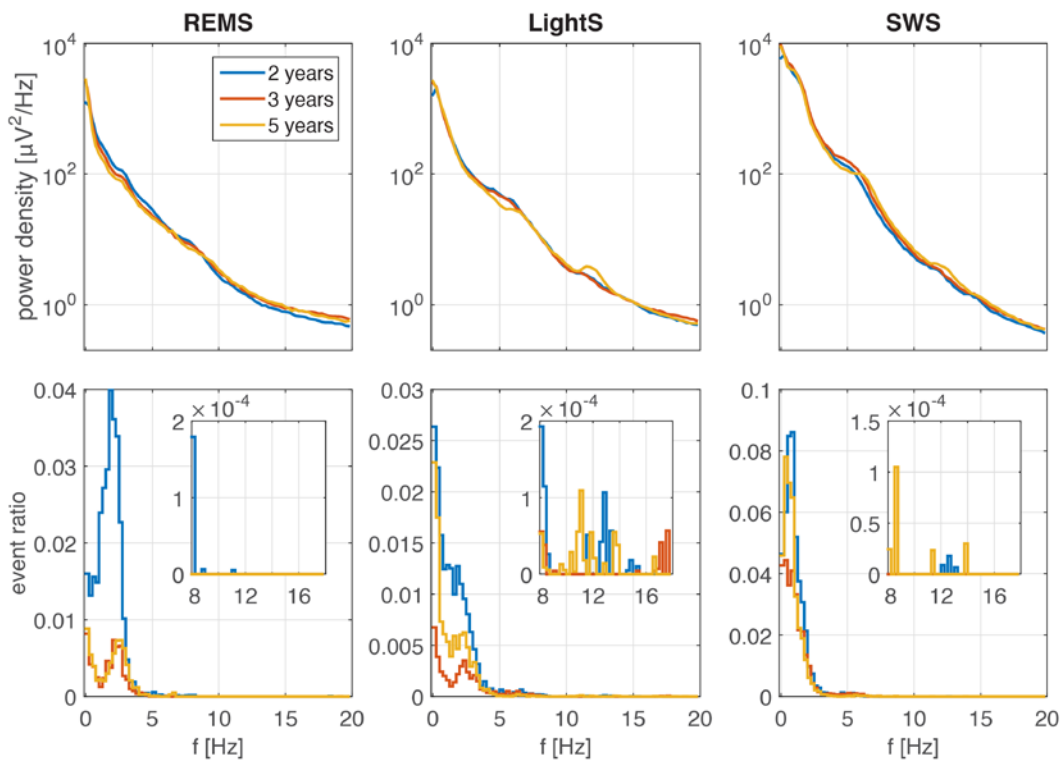

**Figure S3: CHILD C**

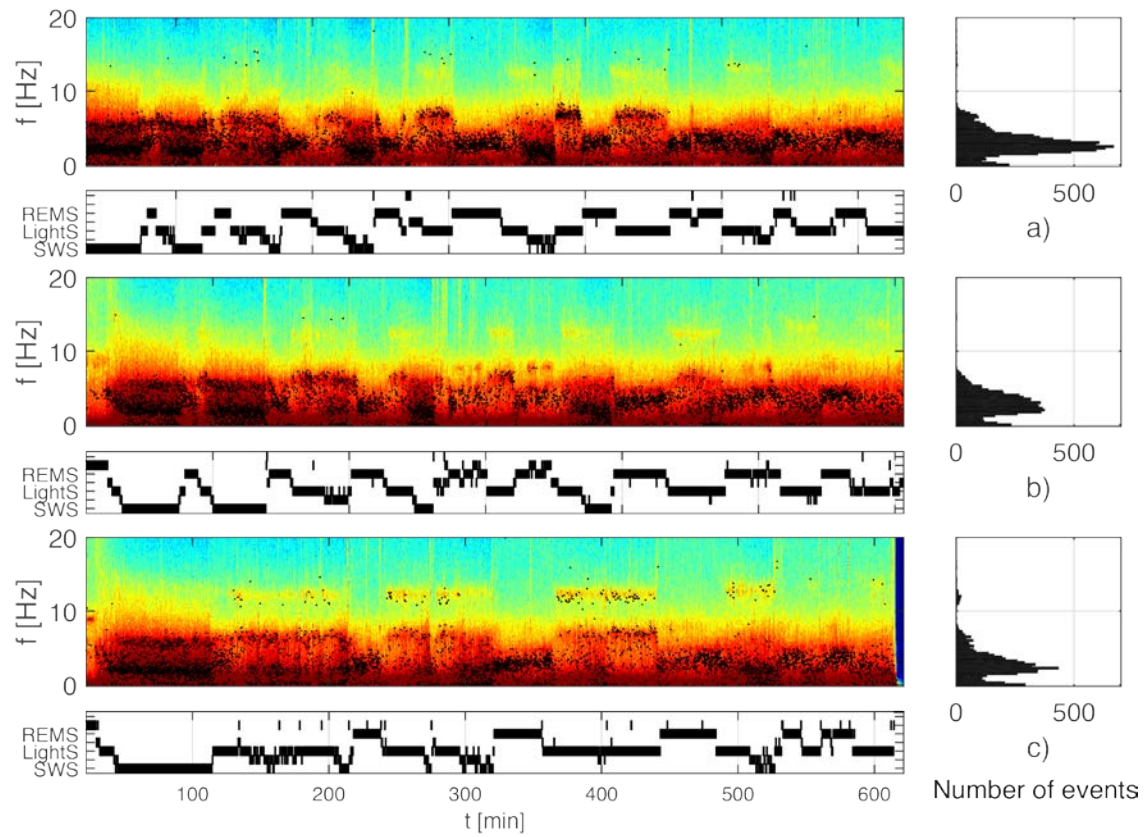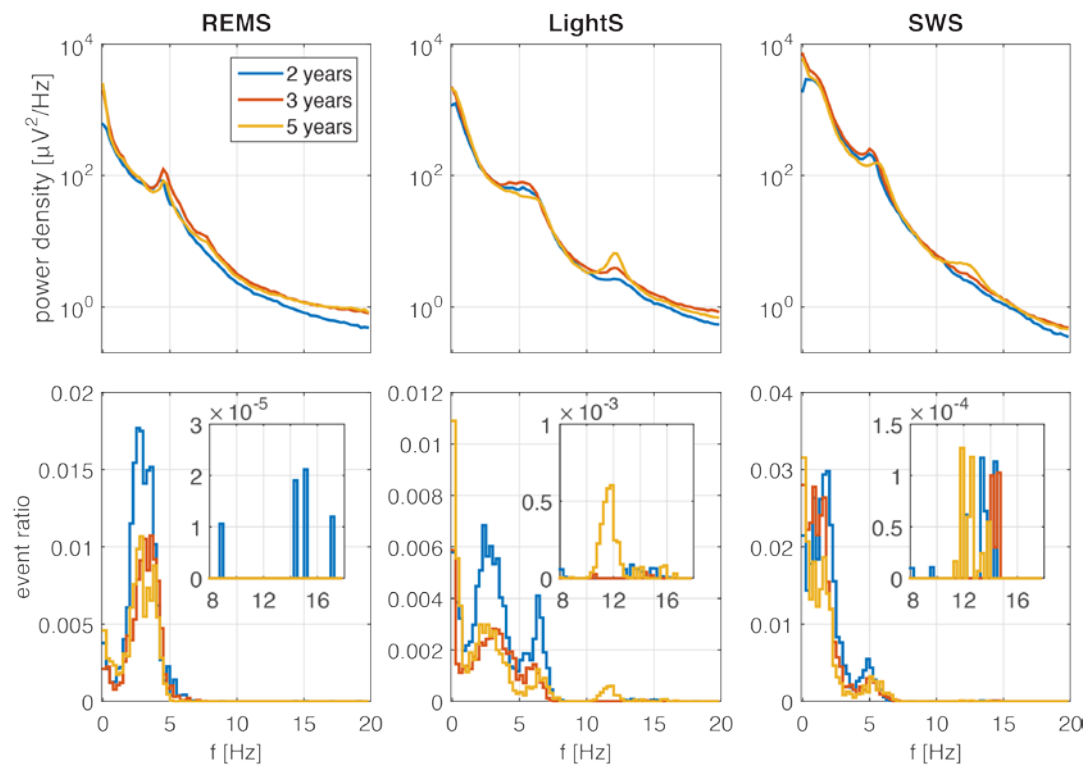

**Figure S4: CHILD D**

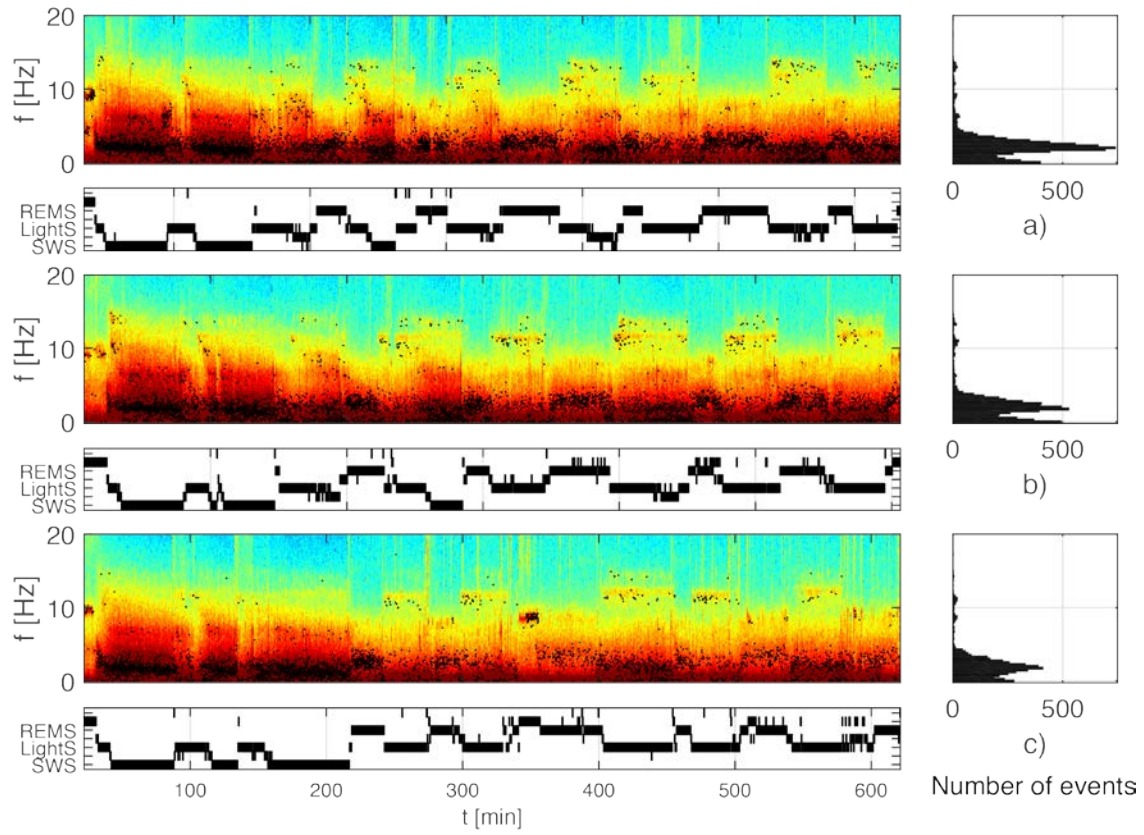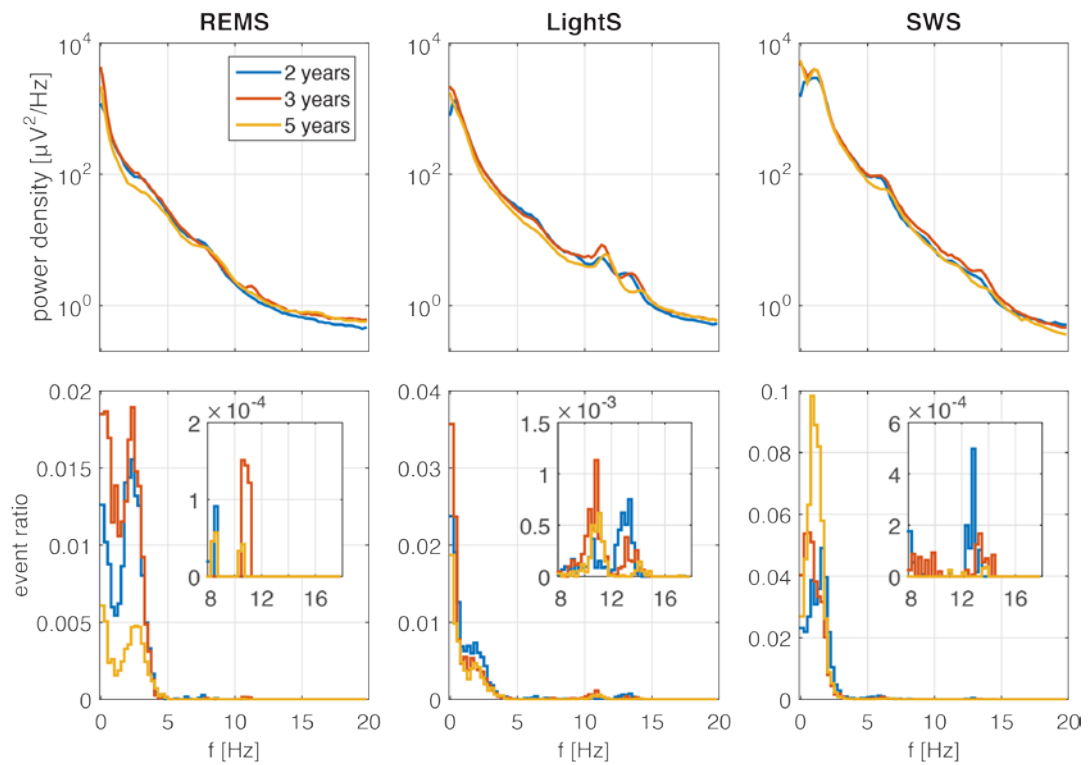

**Figure S5: CHILD E**

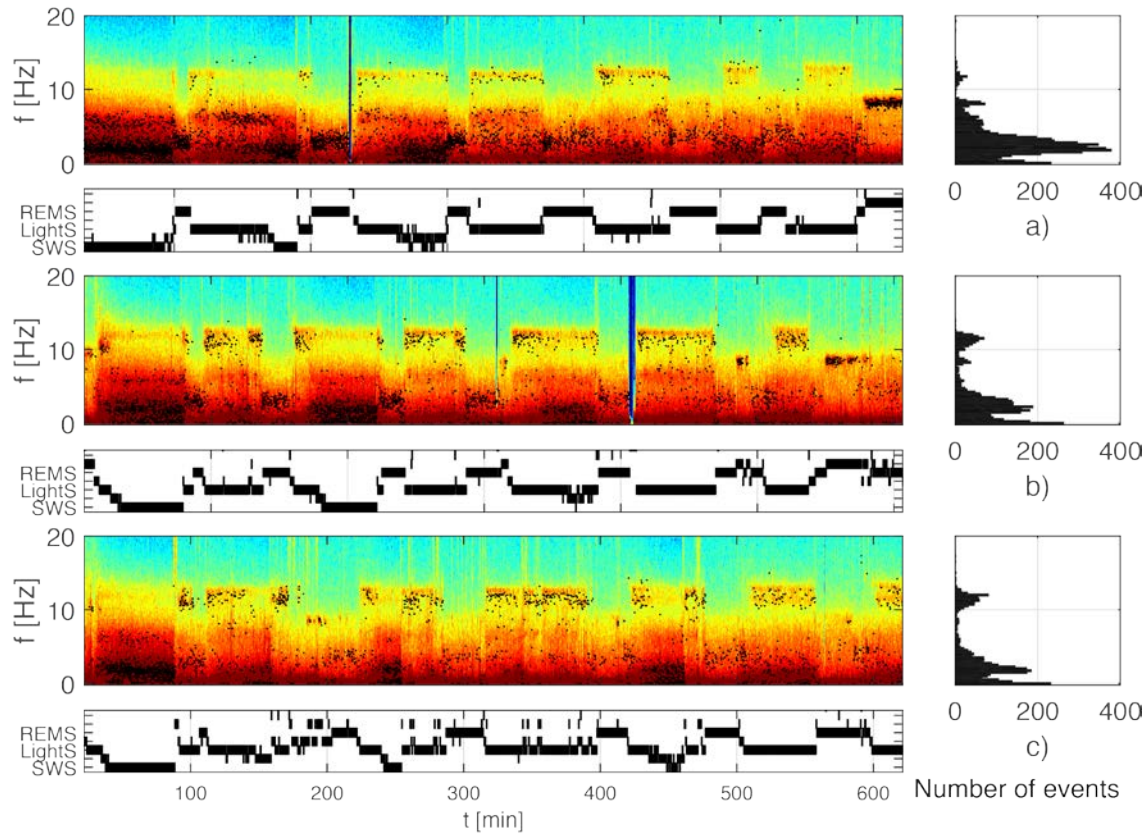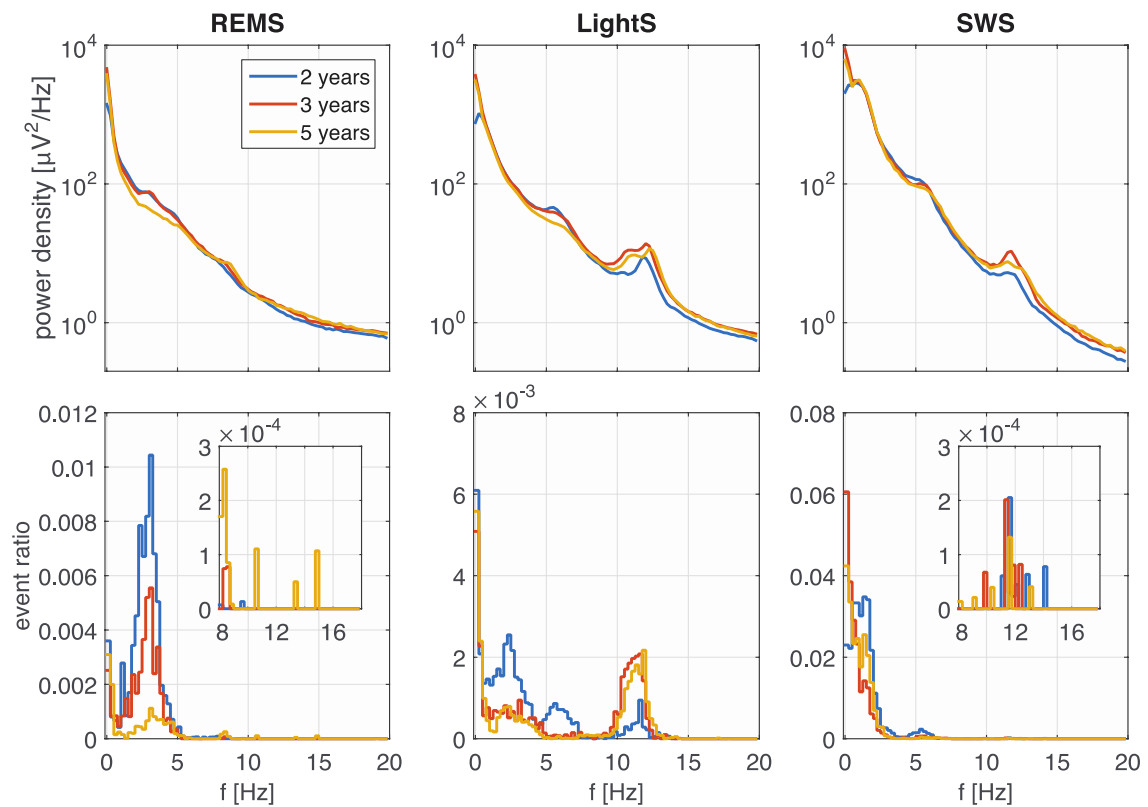

**Figure S6: CHILD F**

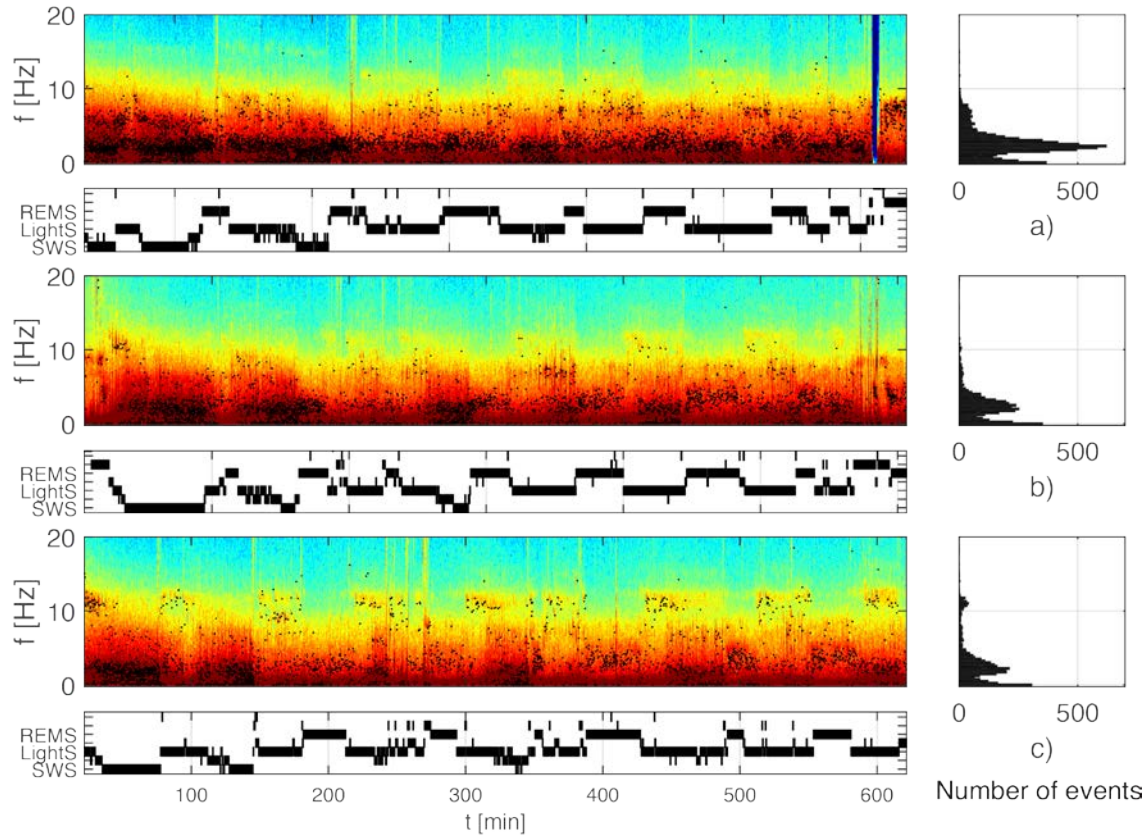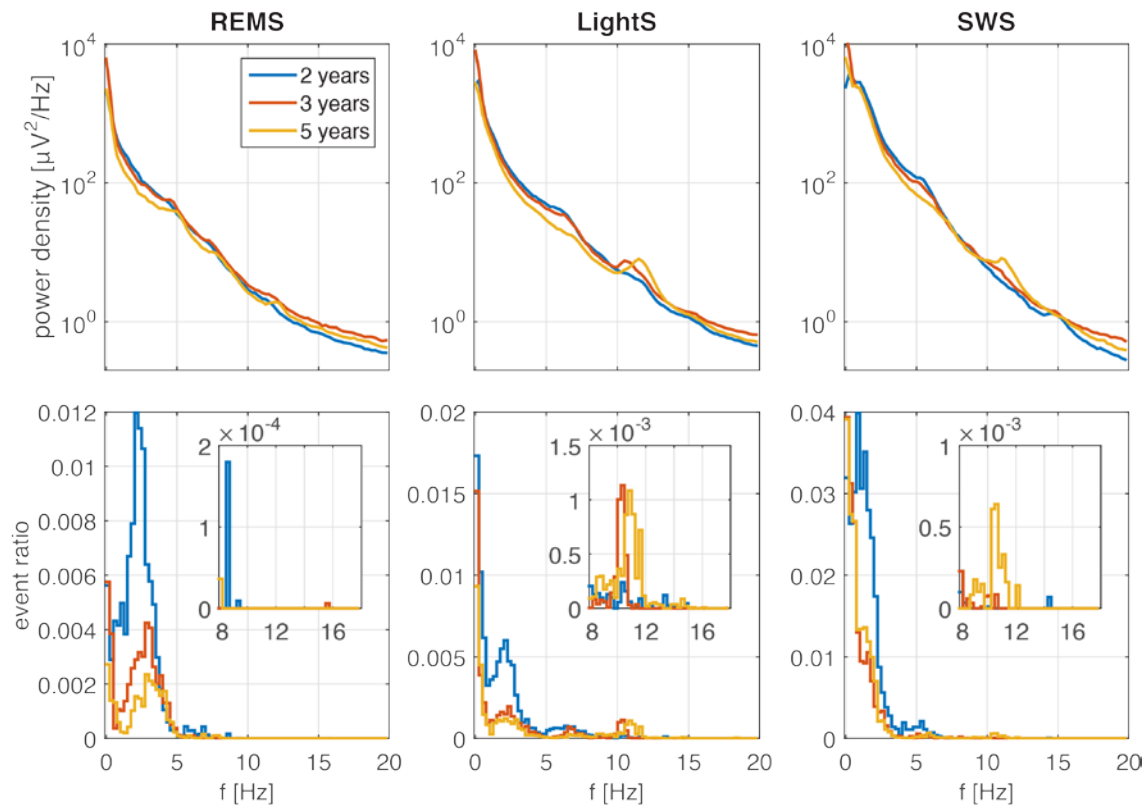



**Figure S7: CHILD G**

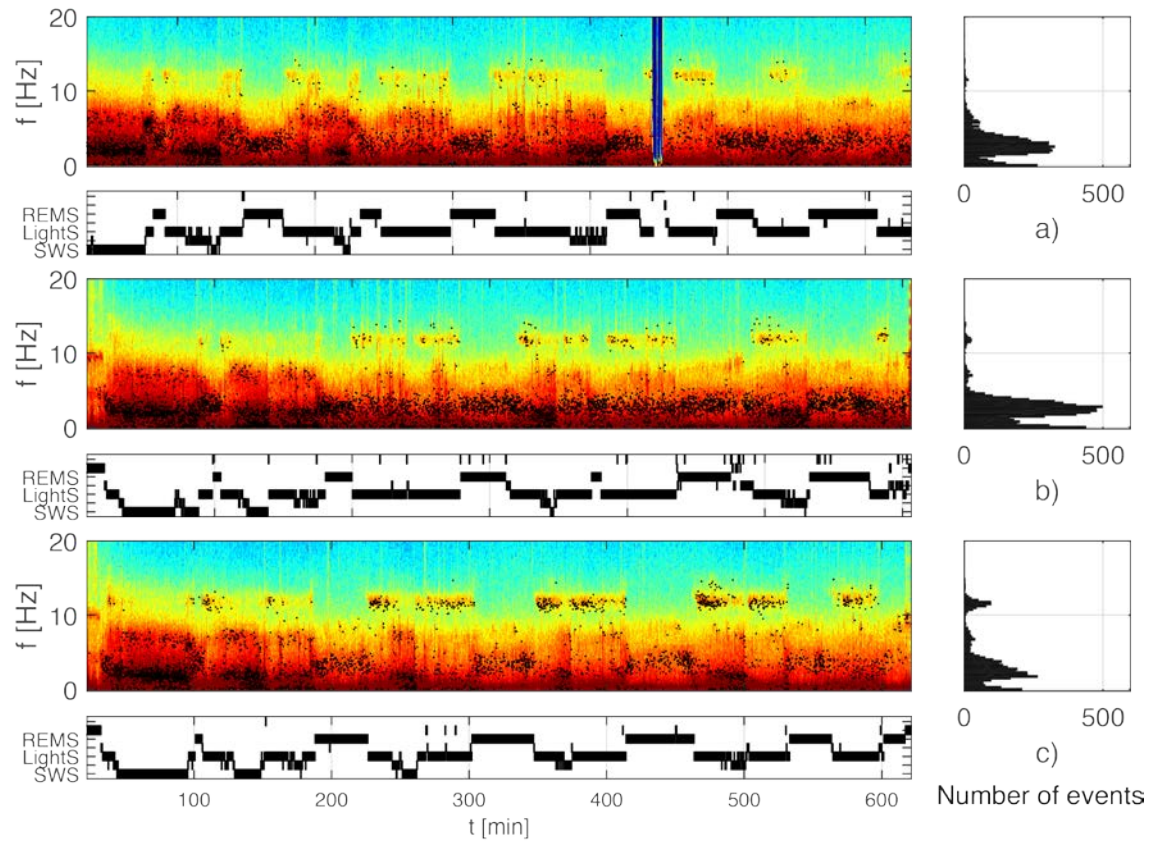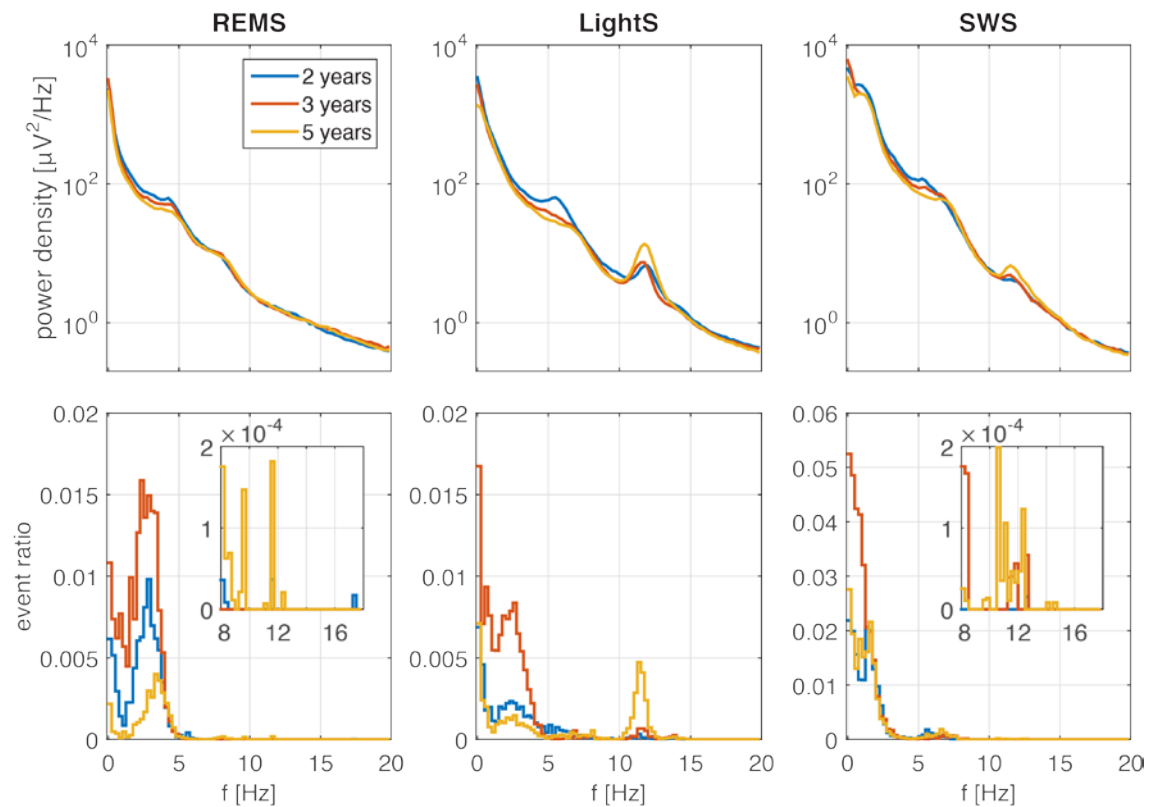

**Figure S8: CHILD H**

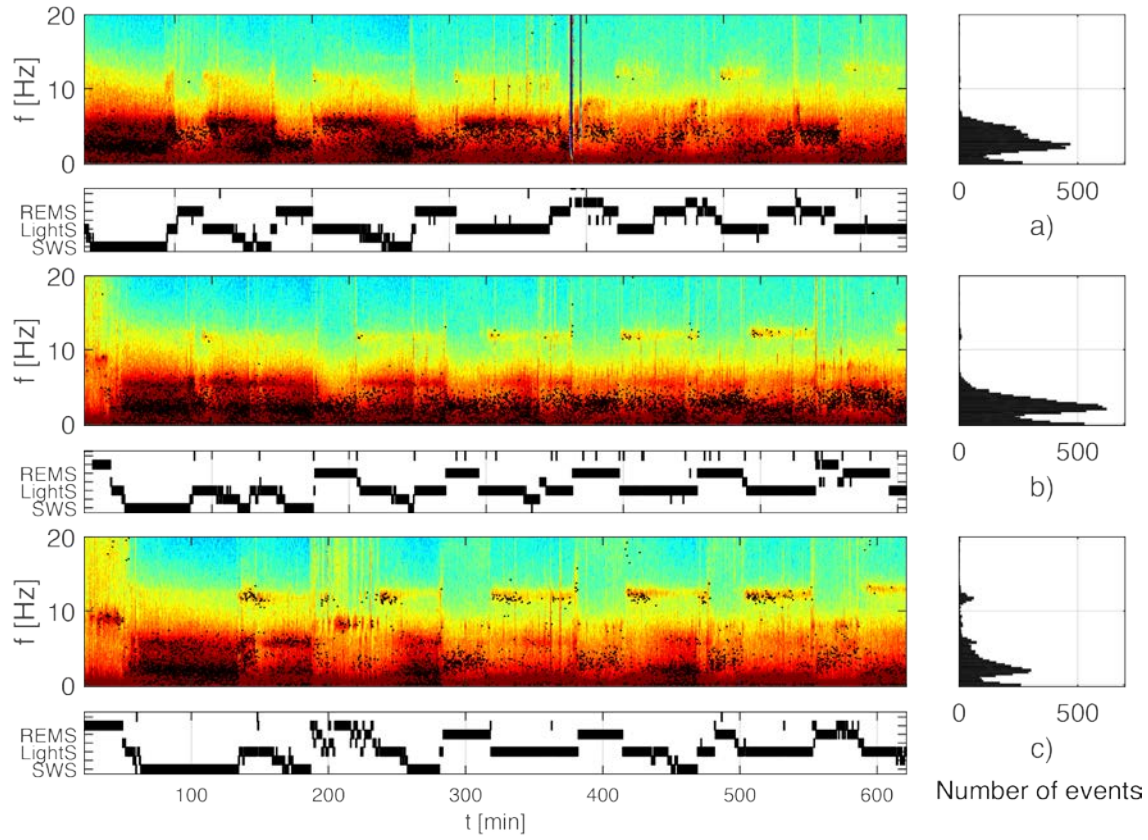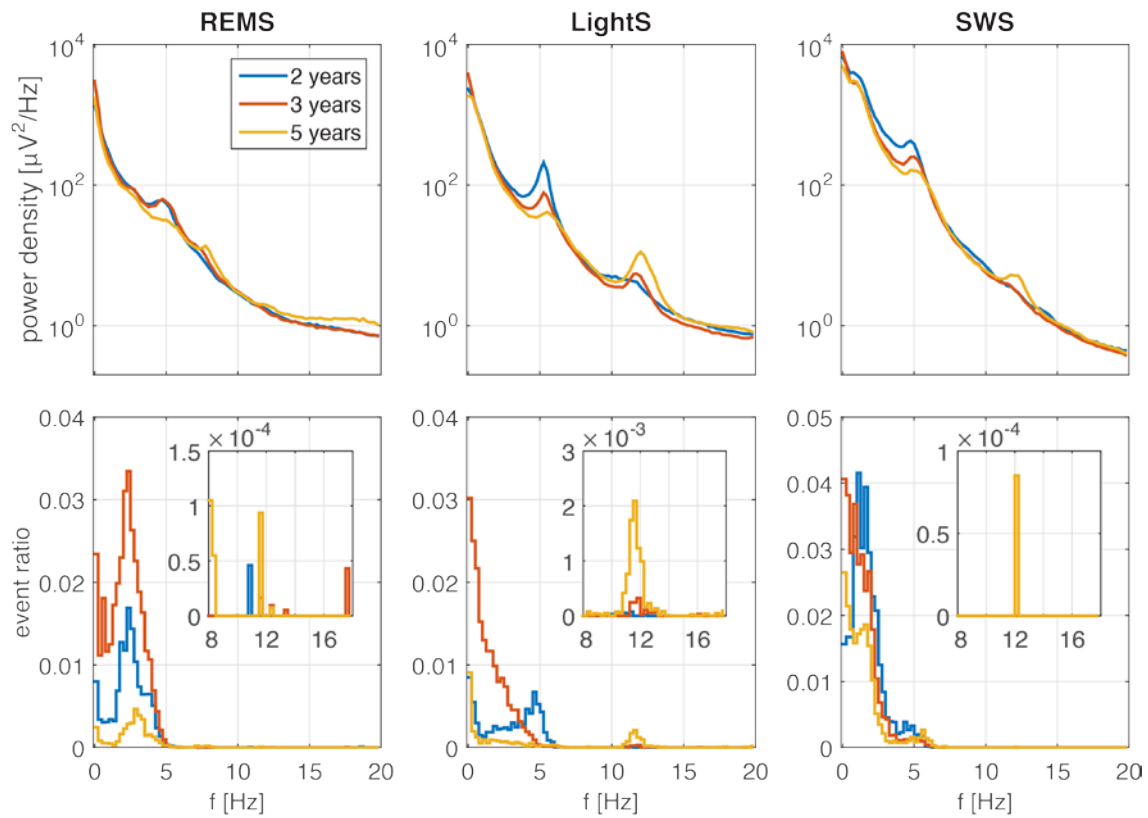

Supplement: 6160959.f1.pdf [file 6160959.f1.pdf]
